# Supplementary material for: A Systematic Review of Chest Imaging Findings in Long COVID Patients
Source: MDPI journal article supplement (doi:10.3390/jpm13020282), 2023-02-01
Supplement: s1 [file s1]

## Supplementary Materials:

Table S1. Details of included studies

| <i>First Author</i>                  | <i>Number of included participants</i> | <i>Age</i> | <i>Female</i> | <i>Male</i> | <i>Long-COVID cases</i> | <i>Age</i> | <i>Female</i> | <i>Male</i> | <i>Long-COVID cases which underwent imaging</i> | <i>Age</i> | <i>Female</i> | <i>Male</i> | <i>ROB</i>  | <i>Study design</i> |
|--------------------------------------|----------------------------------------|------------|---------------|-------------|-------------------------|------------|---------------|-------------|-------------------------------------------------|------------|---------------|-------------|-------------|---------------------|
| <i>Armange et al.</i>                | 214                                    | NM         | NM            | NM          | 99                      | NM         | NM            | NM          | 23                                              | 44         | 18            | 5           | <i>fair</i> | <i>cohort</i>       |
| <i>Bai et al.</i>                    | 7                                      | 66.3       | 4             | 3           | 4                       | 62.7       | 2             | 2           | 4                                               | 62.7       | 2             | 2           | <i>fair</i> | <i>Case-control</i> |
| <i>Cesarone et al.</i>               | 18                                     | 56.9       | 8             | 10          | 18                      | 56.9       | 8             | 10          | 18                                              | 56.9       | 8             | 10          | <i>fair</i> | <i>cohort</i>       |
| <i>Gaspardone et al.</i>             | 70                                     | 68         | 22            | 48          | 70                      | 68         | 22            | 48          | 70                                              | 68         | 22            | 48          | <i>fair</i> | <i>cohort</i>       |
| <i>Rinaldo et al.</i>                | 75                                     | 57         | 32            | 43          | 68                      | NM         | NM            | NM          | 68                                              | NM         | NM            | NM          | <i>fair</i> | <i>cohort</i>       |
| <i>Sollini et al.</i>                | 10                                     | 58         | 3             | 7           | 10                      | 58         | 3             | 7           | 10                                              | 58         | 3             | 7           | <i>fair</i> | <i>cohort</i>       |
| <i>Sollini et al.</i>                | 13                                     | 54         | 5             | 8           | 13                      | 53         | 5             | 8           | 13                                              | 54         | 5             | 8           | <i>fair</i> | <i>Case-control</i> |
| <i>Yin et al</i>                     | 337                                    | 53.5       | 167           | 170         | 91                      | 58.7       | 167           | 170         | 91                                              | 58.7       | 34            | 57          | <i>fair</i> | <i>cohort</i>       |
| <i>Miwa et al.</i>                   | 17                                     | 61.2       | 3             | 14          | 12                      | 60.2       | 2             | 10          | 12                                              | 63.2       | 2             | 10          | <i>fair</i> | <i>cohort</i>       |
| <b>Total originals</b>               | 761                                    | 68.0       | 244           | 303         | 385                     | 59.7       | 94            | 147         | 309                                             | 59.7       | 94            | 147         | <i>fair</i> | ---                 |
| <i>Tung-Chen et al.<sup>30</sup></i> | 1                                      | 41         | 1             | 0           | 1                       | 41         | 1             | 0           | 1                                               | 41         | 1             | 0           | <i>fair</i> | <i>Case-series</i>  |
| <i>Tung-Chen et al.</i>              | 1                                      | 35         | 1             | 0           | 1                       | 35         | 1             | 0           | 1                                               | 35         | 1             | 0           | <i>fair</i> | <i>Case-series</i>  |
| <i>Tung-Chen et al.</i>              | 1                                      | 64         | 0             | 1           | 1                       | 64         | 0             | 1           | 1                                               | 64         | 0             | 1           | <i>fair</i> | <i>Case-series</i>  |
| <i>Scelfo et al.<sup>49</sup></i>    | 1                                      | 59         | 1             | 0           | 1                       | 59         | 1             | 0           | 1                                               | 59         | 1             | 0           | <i>fair</i> | <i>Case-series</i>  |
| <i>Scelfo et al.</i>                 | 1                                      | 59         | 0             | 1           | 1                       | 59         | 0             | 1           | 1                                               | 59         | 0             | 1           | <i>fair</i> | <i>Case-series</i>  |
| <i>Aesif et al.<sup>31</sup></i>     | 1                                      | 46         | 0             | 1           | 1                       | 46         | 0             | 1           | 1                                               | 46         | 0             | 1           | <i>fair</i> | <i>Case-series</i>  |
| <i>Aesif et al.</i>                  | 1                                      | 57         | 1             | 0           | 1                       | 57         | 1             | 0           | 1                                               | 57         | 1             | 0           | <i>fair</i> | <i>Case-series</i>  |
| <i>Aesif et al.</i>                  | 1                                      | 57         | 0             | 1           | 1                       | 57         | 0             | 1           | 1                                               | 57         | 0             | 1           | <i>fair</i> | <i>Case-series</i>  |
| <i>Lago et al.<sup>50</sup></i>      | 1                                      | 72         | 0             | 1           | 1                       | 72         | 0             | 1           | 1                                               | 72         | 0             | 1           | <i>fair</i> | <i>Case-series</i>  |
| <i>Lago et al.</i>                   | 1                                      | 59         | 0             | 1           | 1                       | 59         | 0             | 1           | 1                                               | 59         | 0             | 1           | <i>fair</i> | <i>Case-series</i>  |
| <i>Lago et al.</i>                   | 1                                      | 63         | 1             | 0           | 1                       | 63         | 1             | 0           | 1                                               | 63         | 1             | 0           | <i>fair</i> | <i>Case-series</i>  |
| <i>Lago et al.</i>                   | 1                                      | 62         | 1             | 0           | 1                       | 62         | 1             | 0           | 1                                               | 62         | 1             | 0           | <i>fair</i> | <i>Case-series</i>  |
| <i>Rai et al.<sup>51</sup></i>       | 1                                      | 84         | 0             | 1           | 1                       | 84         | 0             | 1           | 1                                               | 84         | 0             | 1           | <i>fair</i> | <i>Case-series</i>  |
| <i>Rai et al.</i>                    | 1                                      | 65         | 0             | 1           | 1                       | 65         | 0             | 1           | 1                                               | 65         | 0             | 1           | <i>fair</i> | <i>Case-series</i>  |
| <i>Rai et al.</i>                    | 1                                      | 36         | 0             | 1           | 1                       | 36         | 0             | 1           | 1                                               | 36         | 0             | 1           | <i>fair</i> | <i>Case-series</i>  |
| <i>Singh et al.<sup>52</sup></i>     | 1                                      | 45         | 1             | 0           | 1                       | 45         | 1             | 0           | 1                                               | 45         | 1             | 0           | <i>fair</i> | <i>Case-series</i>  |
| <b>Total case-series</b>             | 16                                     | 56.5       | 7             | 9           | 16                      | 56.5       | 7             | 9           | 17                                              | 56.5       | 7             | 10          | <i>fair</i> | <i>Case-series</i>  |
| <i>Abdelnour et al.<sup>53</sup></i> | 1                                      | 68         | 1             | 0           | 1                       | 68         | 1             | 0           | 1                                               | 68         | 1             | 0           | <i>fair</i> | <i>Case-report</i>  |
| <i>Betelli et al.<sup>54</sup></i>   | 1                                      | 67         | 0             | 1           | 1                       | 67         | 0             | 1           | 1                                               | 67         | 0             | 1           | <i>fair</i> | <i>Case-report</i>  |
| <i>Horii et al.<sup>55</sup></i>     | 1                                      | 66         | 0             | 1           | 1                       | 66         | 0             | 1           | 1                                               | 66         | 0             | 1           | <i>fair</i> | <i>Case-report</i>  |
| <i>Zhou et al.<sup>56</sup></i>      | 1                                      | 40         | 0             | 1           | 1                       | 40         | 0             | 1           | 1                                               | 40         | 0             | 1           | <i>fair</i> | <i>Case-report</i>  |
| <i>Alhiyari et al.<sup>32</sup></i>  | 1                                      | 60         | 0             | 1           | 1                       | 60         | 0             | 1           | 1                                               | 60         | 0             | 1           | <i>fair</i> | <i>Case-report</i>  |
| <i>Aissaoui et al.<sup>59</sup></i>  | 1                                      | 61         | 0             | 1           | 1                       | 61         | 0             | 1           | 1                                               | 61         | 0             | 1           | <i>fair</i> | <i>Case-report</i>  |
| <i>Dayco et al.<sup>58</sup></i>     | 1                                      | 69         | 0             | 1           | 1                       | 69         | 0             | 1           | 1                                               | 69         | 0             | 1           | <i>fair</i> | <i>Case-report</i>  |
| <i>Garg et al.<sup>28</sup></i>      | 1                                      | 61         | 0             | 1           | 1                       | 61         | 0             | 1           | 1                                               | 61         | 0             | 1           | <i>fair</i> | <i>Case-report</i>  |
| <i>Hamad et al.<sup>33</sup></i>     | 1                                      | 42         | 0             | 1           | 1                       | 42         | 0             | 1           | 1                                               | 42         | 0             | 1           | <i>fair</i> | <i>Case-report</i>  |
| <i>Heiss et al.<sup>29</sup></i>     | 1                                      | 60         | 0             | 1           | 1                       | 60         | 0             | 1           | 1                                               | 60         | 0             | 1           | <i>fair</i> | <i>Case-report</i>  |
| <i>Liu et al.<sup>59</sup></i>       | 1                                      | 57         | 1             | 0           | 1                       | 57         | 1             | 0           | 1                                               | 57         | 1             | 0           | <i>fair</i> | <i>Case-report</i>  |

|                                |    |      |   |    |    |      |   |    |    |      |   |    |      |             |
|--------------------------------|----|------|---|----|----|------|---|----|----|------|---|----|------|-------------|
| Malik et al. <sup>34</sup>     | 1  | 67   | 0 | 1  | 1  | 67   | 0 | 1  | 1  | 67   | 0 | 1  | fair | Case-report |
| Mazzolini et al. <sup>60</sup> | 1  | 74   | 1 | 0  | 1  | 74   | 1 | 0  | 1  | 74   | 1 | 0  | fair | Case-report |
| Mitrani et al. <sup>61</sup>   | 1  | 55   | 0 | 1  | 1  | 55   | 0 | 1  | 1  | 55   | 0 | 1  | fair | Case-report |
| Susanto et al. <sup>62</sup>   | 1  | 46   | 0 | 1  | 1  | 46   | 0 | 1  | 1  | 46   | 0 | 1  | poor | Case-report |
| Zhu et al. <sup>63</sup>       | 1  | 30   | 0 | 1  | 1  | 30   | 0 | 1  | 1  | 30   | 0 | 1  | fair | Case-report |
| Boehm et al. <sup>64</sup>     | 1  | 70   | 0 | 1  | 1  | 70   | 0 | 1  | 1  | 70   | 0 | 1  | fair | Case-report |
| <b>Total case-reports</b>      | 17 | 58.4 | 3 | 14 | 17 | 58.4 | 3 | 14 | 30 | 57.7 | 3 | 27 | ---  | Case-report |

Table S2. Risk factors and comorbidities of Long-COVID patients in the included articles

| First Author      | Previously smoker | Currently smoker | Hypertension | Diabetes | Chronic obstructive lung disease | Autoimmune Disease | Asthma | Chronic polmunary Disease | Intubated cases |
|-------------------|-------------------|------------------|--------------|----------|----------------------------------|--------------------|--------|---------------------------|-----------------|
| Armange et al.    | NM                | 4                | NM           | NM       | NM                               | NM                 | 4      | NM                        | 0               |
| Bai et al.        | NM                | NM               | 1            | 0        | 0                                | 0                  | 0      | 0                         | NM              |
| Cesarone et al.   | NM                | NM               | NM           | NM       | NM                               | NM                 | NM     | NM                        | NM              |
| Gaspardone et al. | NM                | 5                | 37           | 15       | 4                                | 0                  | 0      | 0                         | 43              |
| Rinaldo et al.    | NM                | NM               | NM           | NM       | NM                               | NM                 | NM     | NM                        | NM              |
| Sollini et al.    | NM                | NM               | NM           | NM       | NM                               | NM                 | NM     | NM                        | 2               |
| Sollini et al.    | NM                | NM               | 3            | 3        | 0                                | 1                  | 0      | 0                         | NM              |
| Yin et al.        | NM                | 8                | NM           | NM       | NM                               | NM                 | NM     | NM                        | NM              |
| Miwa et al.       | 6                 | 2                | 6            | 5        | 0                                | 0                  | 1      | 0                         | 12              |
| Tung-Chen et al.  | NM                | NM               | NM           | NM       | NM                               | NM                 | NM     | NM                        | NM              |
| Tung-Chen et al.  | NM                | NM               | NM           | NM       | NM                               | NM                 | NM     | NM                        | NM              |
| Tung-Chen et al.  | NM                | NM               | NM           | NM       | NM                               | NM                 | NM     | NM                        | NM              |
| Scelfo et al.     | NM                | 0                | 0            | 0        | 0                                | 1                  | 0      | 0                         | 0               |
| Scelfo et al.     | NM                | 0                | 1            | 0        | 0                                | 0                  | 0      | 0                         | 1               |
| Aesif et al.      | NM                | NM               | 1            | 0        | 0                                | 0                  | 0      | 0                         | 1               |
| Aesif et al.      | NM                | NM               | 0            | 0        | 0                                | 0                  | 0      | 0                         | 0               |
| Aesif et al.      | NM                | NM               | 1            | 0        | 0                                | 0                  | 0      | 0                         | 0               |
| Lago et al.       | 1                 | 0                | 0            | 0        | 0                                | 0                  | 0      | 0                         | 0               |
| Lago et al.       | 1                 | 0                | 1            | 0        | 0                                | 0                  | 0      | 0                         | 0               |
| Lago et al.       | 1                 | 0                | 1            | 0        | 0                                | 0                  | 0      | 0                         | 0               |
| Lago et al.       | 1                 | 0                | 0            | 1        | 0                                | 0                  | 0      | 0                         | 0               |
| Rai et al.        | 0                 | 0                | 0            | 0        | 0                                | 0                  | 0      | 0                         | 0               |
| Rai et al.        | 0                 | 0                | 0            | 0        | 0                                | 0                  | 0      | 0                         | 0               |
| Rai et al.        | 0                 | 0                | 0            | 0        | 0                                | 0                  | 0      | 0                         | 0               |
| Singh et al.      | 0                 | 0                | 1            | 0        | 0                                | 0                  | 0      | 0                         | 0               |
| Abdelnour et al.  | NM                | NM               | 0            | 0        | 0                                | 0                  | 0      | 0                         | 1               |
| Betelli et al.    | NM                | NM               | 1            | 0        | 0                                | 0                  | 0      | 0                         | 0               |
| Horii et al.      | 1                 | 1                | 1            | 0        | 0                                | 0                  | 0      | 0                         | 1               |
| Zhou et al.       | NM                | NM               | 0            | 0        | 0                                | 0                  | 0      | 0                         | 0               |
| Alhiyari et al.   | 0                 | 0                | 0            | 1        | 0                                | 0                  | 0      | 0                         | 0               |
| Aissaoui et al.   | 0                 | 0                | 0            | 0        | 0                                | 0                  | 1      | 0                         | 0               |
| Dayco et al.      | NM                | NM               | 0            | 0        | 0                                | 0                  | 0      | 0                         | 0               |

|                  |    |    |    |    |    |    |    |    |    |
|------------------|----|----|----|----|----|----|----|----|----|
| Garg et al.      | NM | NM | 0  | 1  | 0  | 0  | 0  | 0  | 0  |
| Hamad et al.     | NM |
| Heiss et al.     | NM | 0  |
| Liu et al.       | NM |
| Malik et al.     | NM | NM | 1  | 0  | 0  | 0  | 0  | 0  | 0  |
| Mazzolini et al. | 1  | 1  | 0  | 0  | 1  | 0  | 0  | 0  | 0  |
| Mitrani et al.   | NM | 0  |
| Susanto et al.   | 0  | 0  | 0  | 0  | 0  | 0  | 0  | 0  | NM |
| Zhu et al.       | 0  | 0  | 0  | 0  | 0  | 0  | 0  | 0  | 0  |
| Boehm et al.     | 1  | 0  | 1  | 0  | 0  | 0  | 0  | 0  | 1  |

Table S3. Frequency of administrated medications during the acute phase in participants of included studies

| First Author      | Cases | COVID Medical Treatment | Anti-coagulants | Hydroxychloroquine | Corticostroids | Oral Antibiotics | Intra-venous Antibiotics | Antiviral therapy | IL-1 inhibitor | IL-6 inhibitors | Immunoglobulin therapy |
|-------------------|-------|-------------------------|-----------------|--------------------|----------------|------------------|--------------------------|-------------------|----------------|-----------------|------------------------|
| Armange et al.    | 23    | NM                      | NM              | NM                 | NM             | NM               | NM                       | NM                | NM             | NM              | NM                     |
| Bai et al.        | 4     | 4                       | NM              | 0                  | 3              | 3                | 0                        | 4                 | 0              | 0               | 0                      |
| Cesarone et al.   | 18    | NM                      | NM              | NM                 | NM             | NM               | NM                       | NM                | NM             | NM              | NM                     |
| Gaspardone et al. | 70    | 55                      | NM              | 48                 | NM             | 25               | NM                       | 39                | 18             | 7               | NM                     |
| Rinaldo et al.    | 68    | NM                      | NM              | NM                 | NM             | NM               | NM                       | NM                | NM             | NM              | NM                     |
| Sollini et al.    | 10    | NM                      | 3               | 3                  | NM             | NM               | NM                       | NM                | NM             | NM              | NM                     |
| Sollini et al.    | 13    | 3                       | 7               | 6                  | 5              | 4                | 5                        | 4                 | 0              | 0               | 0                      |
| Yin et al.        | 91    | NM                      | NM              | NM                 | NM             | NM               | NM                       | 83                | NM             | NM              | 55                     |
| Miwa et al.       | 12    | NM                      | NM              | NM                 | NM             | NM               | NM                       | NM                | NM             | NM              | NM                     |
| Tung-Chen et al.  | 1     | NM                      | NM              | NM                 | NM             | NM               | NM                       | NM                | NM             | NM              | NM                     |
| Tung-Chen et al.  | 1     | NM                      | NM              | NM                 | NM             | NM               | NM                       | NM                | NM             | NM              | NM                     |
| Scelfo et al.     | 1     | 1                       | 0               | 1                  | 0              | 0                | 0                        | 1                 | 0              | 1               | 0                      |
| Scelfo et al.     | 1     | 1                       | 0               | 1                  | 0              | 0                | 0                        | 1                 | 0              | 1               | 0                      |
| Aesif et al.      | 1     | 1                       | 0               | 0                  | 0              | 0                | 0                        | 1                 | 0              | 1               | 0                      |
| Aesif et al.      | 1     | 1                       | 0               | 0                  | 0              | 0                | 0                        | 1                 | 0              | 0               | 0                      |
| Aesif et al.      | 1     | 1                       | 1               | 1                  | 1              | 1                | 0                        | 0                 | 1              | 1               | 0                      |
| Lago et al.       | 1     | NM                      | NM              | NM                 | NM             | NM               | NM                       | NM                | NM             | NM              | NM                     |
| Lago et al.       | 1     | NM                      | NM              | NM                 | NM             | NM               | NM                       | NM                | NM             | NM              | NM                     |
| Lago et al.       | 1     | NM                      | NM              | NM                 | NM             | NM               | NM                       | NM                | NM             | NM              | NM                     |
| Lago et al.       | 1     | NM                      | NM              | NM                 | NM             | NM               | NM                       | NM                | NM             | NM              | NM                     |
| Rai et al.        | 1     | 1                       | 1               | 0                  | 1              | 0                | 0                        | 1                 | 0              | 0               | 0                      |
| Rai et al.        | 1     | 1                       | 1               | 0                  | 1              | 0                | 0                        | 0                 | 0              | 0               | 0                      |
| Rai et al.        | 1     | 1                       | 0               | 0                  | 1              | 0                | 1                        | 1                 | 0              | 0               | 0                      |
| Singh et al.      | 1     | 1                       | 1               | 0                  | 1              | 1                | 0                        | 0                 | 0              | 0               | 0                      |
| Abdelnour et al.  | 1     | 0                       | 0               | 0                  | 0              | 0                | 1                        | 0                 | 0              | 0               | 0                      |
| Betelli et al.    | 1     | 1                       | 1               | 1                  | 0              | 1                | 1                        | 0                 | 0              | 0               | 0                      |

|                         |   |   |   |   |   |   |   |   |   |   |   |
|-------------------------|---|---|---|---|---|---|---|---|---|---|---|
| <i>Horii et al.</i>     | 1 | 1 | 0 | 1 | 0 | 0 | 1 | 1 | 0 | 1 | 0 |
| <i>Zhou et al.</i>      | 1 | 1 | 0 | 0 | 1 | 0 | 0 | 1 | 0 | 0 | 1 |
| <i>Alhiyari et al.</i>  | 1 | 1 | 0 | 0 | 1 | 0 | 1 | 1 | 0 | 0 | 0 |
| <i>Aissaoui et al.</i>  | 1 | 0 | 1 | 0 | 1 | 0 | 0 | 0 | 0 | 0 | 0 |
| <i>Dayco et al.</i>     | 1 | 1 | 0 | 0 | 1 | 0 | 0 | 0 | 0 | 0 | 0 |
| <i>Garg et al.</i>      | 1 | 1 | 0 | 0 | 1 | 0 | 0 | 1 | 0 | 0 | 0 |
| <i>Hamad et al.</i>     | 1 | 0 | 0 | 0 | 0 | 0 | 0 | 0 | 0 | 0 | 0 |
| <i>Heiss et al.</i>     | 1 | 0 | 0 | 0 | 0 | 0 | 0 | 0 | 0 | 0 | 0 |
| <i>Liu et al.</i>       | 1 | 1 | 0 | 0 | 1 | 0 | 0 | 1 | 0 | 0 | 0 |
| <i>Malik et al.</i>     | 1 | 1 | 1 | 0 | 1 | 1 | 1 | 1 | 0 | 0 | 0 |
| <i>Mazzolini et al.</i> | 1 | 1 | 1 | 1 | 1 | 1 | 0 | 0 | 0 | 1 | 0 |
| <i>Mitrani et al.</i>   | 1 | 1 | 0 | 0 | 1 | 0 | 1 | 0 | 0 | 0 | 0 |
| <i>Susanto et al.</i>   | 1 | 1 | 0 | 1 | 0 | 1 | 1 | 1 | 0 | 0 | 0 |
| <i>Zhu et al.</i>       | 1 | 0 | 0 | 0 | 1 | 0 | 1 | 1 | 0 | 0 | 0 |
| <i>Boehm et al.</i>     | 1 | 1 | 0 | 1 | 1 | 1 | 1 | 1 | 0 | 0 | 0 |

Table S4. Frequency of Long-COVID symptoms in participants of included studies

| First Author             | Cough | Fatigue | Weakness | Dyspnea | Dyspnea on exertin |
|--------------------------|-------|---------|----------|---------|--------------------|
| <i>Armenge et al.</i>    | NM    | NM      | 9        | 19      | NM                 |
| <i>Bai et al.</i>        | 4     | 1       | 0        | 0       | 0                  |
| <i>Cesarone et al.</i>   | 2     | 5       | NM       | 6       | NM                 |
| <i>Gaspardone et al.</i> | NM    | NM      | NM       | NM      | NM                 |
| <i>Rinaldo et al.</i>    | NM    | NM      | NM       | NM      | NM                 |
| <i>Sollini et al.</i>    | NM    | 7       | NM       | 7       | NM                 |
| <i>Sollini et al.</i>    | 0     | 8       | 0        | 9       | 0                  |
| <i>Yin et al.</i>        | NM    | NM      | NM       | 91      | NM                 |
| <i>Miwa et al.</i>       | NM    | NM      | NM       | NM      | 7                  |
| <i>Tung-Chen et al.</i>  | 0     | 0       | 1        | 0       | 1                  |
| <i>Tung-Chen et al.</i>  | 0     | 0       | 1        | 0       | 1                  |
| <i>Tung-Chen et al.</i>  | 0     | 0       | 1        | 0       | 1                  |
| <i>Scelfo et al.</i>     | 0     | 1       | 0        | 1       | 0                  |
| <i>Scelfo et al.</i>     | 0     | 0       | 1        | 1       | 0                  |
| <i>Aesif et al.</i>      | NM    | NM      | NM       | NM      | NM                 |
| <i>Aesif et al.</i>      | NM    | NM      | NM       | NM      | NM                 |
| <i>Aesif et al.</i>      | NM    | NM      | NM       | NM      | NM                 |
| <i>Lago et al.</i>       | NM    | 1       | NM       | 0       | NM                 |
| <i>Lago et al.</i>       | NM    | 1       | NM       | 0       | NM                 |
| <i>Lago et al.</i>       | NM    | 1       | NM       | 0       | NM                 |
| <i>Lago et al.</i>       | NM    | 0       | NM       | 1       | NM                 |
| <i>Rai et al.</i>        | NM    | NM      | NM       | NM      | NM                 |
| <i>Rai et al.</i>        | NM    | NM      | NM       | NM      | 1                  |
| <i>Rai et al.</i>        | NM    | NM      | NM       | NM      | 1                  |
| <i>Singh et al.</i>      | 0     | NM      | NM       | 1       | NM                 |

|                         |    |    |    |    |    |
|-------------------------|----|----|----|----|----|
| <i>Abdelnour et al.</i> | NM | NM | NM | NM | NM |
| <i>Betelli et al.</i>   | 0  | 0  | 0  | 1  | 0  |
| <i>Horii et al.</i>     | NM | NM | NM | NM | NM |
| <i>Zhou et al.</i>      | NM | NM | NM | NM | NM |
| <i>Alhiyari et al.</i>  | 1  | NM | NM | NM | NM |
| <i>Aissaoui et al.</i>  | 0  | 0  | 0  | 1  | 1  |
| <i>Dayco et al.</i>     | NM | NM | NM | NM | NM |
| <i>Garg et al.</i>      | NM | NM | NM | NM | 1  |
| <i>Hamad et al.</i>     | 1  | 0  | 0  | 1  | NM |
| <i>Heiss et al.</i>     | NM | NM | NM | NM | 1  |
| <i>Liu et al.</i>       | 1  | NM | NM | NM | NM |
| <i>Malik et al.</i>     | NM | NM | NM | 1  | NM |
| <i>Mazzolini et al.</i> | NM | NM | NM | 1  | NM |
| <i>Mitrani et al.</i>   | NM | NM | NM | 1  | 1  |
| <i>Susanto et al.</i>   | NM | NM | NM | 1  | NM |
| <i>Zhu et al.</i>       | 1  | NM | NM | 1  | NM |
| <i>Boehm et al.</i>     | NM | NM | NM | NM | NM |

Table S5. Imaging modalities and imaging findings of included case-studies

| <i>First Author</i>                  | <i>Evaluation setting</i>        | <i>Evaluation time in days (performing the imaging)</i> | <i>Imaging Modality</i> | <i>imaging finding</i>                                                                                                                 | <i>Category Interstitial</i> | <i>Category Pleural</i> | <i>Category Airway</i> | <i>Category Parenchymal</i> |
|--------------------------------------|----------------------------------|---------------------------------------------------------|-------------------------|----------------------------------------------------------------------------------------------------------------------------------------|------------------------------|-------------------------|------------------------|-----------------------------|
| <i>Tung-Chen et al.<sup>30</sup></i> | <i>Re-admission</i>              | 56                                                      | <i>CT, US</i>           | <i>pleural thickening</i>                                                                                                              | 0                            | 1                       | 0                      | 0                           |
| <i>Tung-Chen et al.</i>              | <i>Re-admission</i>              | 56                                                      | <i>CT, US</i>           | <i>GGO</i>                                                                                                                             | 0                            | 0                       | 0                      | 1                           |
| <i>Tung-Chen et al.</i>              | <i>Re-admission</i>              | 56                                                      | <i>CT, US</i>           | <i>Fibrotic change</i>                                                                                                                 | 0                            | 0                       | 0                      | 0                           |
| <i>Scelfo et al.<sup>49</sup></i>    | <i>Re-admission</i>              | 29                                                      | <i>CT</i>               | <i>GGO, Consolidation, linear scarring, interstitial thickening</i>                                                                    | 1                            | 0                       | 0                      | 1                           |
| <i>Scelfo et al.</i>                 | <i>Re-admission</i>              | 28                                                      | <i>CT</i>               | <i>Consolidation, pleural effusion, reticulation</i>                                                                                   | 1                            | 1                       | 0                      | 1                           |
| <i>Aesif et al.<sup>31</sup></i>     | <i>Prolonged hospitalization</i> | 38                                                      | <i>CT</i>               | <i>GGO, Consolidation, pneumothorax, hemopneumothorax, airspace opacity</i>                                                            | 0                            | 1                       | 0                      | 1                           |
| <i>Aesif et al.</i>                  | <i>Prolonged hospitalization</i> | 40                                                      | <i>CT</i>               | <i>Consolidation, pleural effusion, airspace opacity</i>                                                                               | 0                            | 1                       | 0                      | 1                           |
| <i>Aesif et al.</i>                  | <i>Prolonged hospitalization</i> | 122                                                     | <i>CXR</i>              | <i>complete opacification, volume loss</i>                                                                                             | 0                            | 0                       | 0                      | 1                           |
| <i>Lago et al.<sup>50</sup></i>      | <i>Follow-up assessment</i>      | 90                                                      | <i>CT</i>               | <i>GGO, reticular opacity, volume loss</i>                                                                                             | 0                            | 0                       | 0                      | 1                           |
| <i>Lago et al.</i>                   | <i>Follow-up assessment</i>      | 90                                                      | <i>CT</i>               | <i>GGO, reticular opacity, volume loss</i>                                                                                             | 0                            | 0                       | 0                      | 1                           |
| <i>Lago et al.</i>                   | <i>Follow-up assessment</i>      | 90                                                      | <i>CT</i>               | <i>GGO, reticular opacity, volume loss</i>                                                                                             | 0                            | 0                       | 0                      | 1                           |
| <i>Lago et al.</i>                   | <i>Follow-up assessment</i>      | 90                                                      | <i>CT</i>               | <i>GGO, reticular opacity, volume loss</i>                                                                                             | 0                            | 0                       | 0                      | 1                           |
| <i>Rai et al.<sup>51</sup></i>       | <i>Prolonged hospitalization</i> | 28                                                      | <i>CT</i>               | <i>reticular opacity, bronchiolectasis, bronchiectasis, emphysematous changes, architectural distortion, honeycomb-like appearance</i> | 1                            | 0                       | 1                      | 1                           |

|                                |                           |       |           |                                                                                                                              |    |    |    |    |
|--------------------------------|---------------------------|-------|-----------|------------------------------------------------------------------------------------------------------------------------------|----|----|----|----|
| Rai et al.                     | Prolonged hospitalization | 42    | CT, CXR   | GGO, Consolidation, reticulation, honeycomb-like appearance, volume loss                                                     | 1  | 0  | 0  | 1  |
| Rai et al.                     | prolonged hospitalization | 29    | CT        | GGO, Fibrotic change                                                                                                         | 1  | 0  | 0  | 1  |
| Singh et al. <sup>52</sup>     | prolonged hospitalization | 31    | CT        | GGO, bronchiectasis, interstitial thickening                                                                                 | 1  | 0  | 1  | 0  |
| Abdelnour et al. <sup>53</sup> | prolonged hospitalization | 41    | CXR       | Aeration                                                                                                                     | 0  | 0  | 0  | 1  |
| Betelli et al. <sup>54</sup>   | re-admission              | 35    | CT        | GGO, Consolidation, pleural effusion                                                                                         | 0  | 1  | 0  | 1  |
| Horii et al. <sup>55</sup>     | prolonged hsp             | 50    | CT        | GGO, Consolidation, pleural effusion, atelectasis                                                                            | 0  | 1  | 0  | 1  |
| Zhou et al. <sup>56</sup>      | re-admission              | 44    | CT        | Consolidation                                                                                                                | 0  | 0  | 0  | 1  |
| Alhiyari et al. <sup>32</sup>  | re-admission              | 130   | CT        | GGO, bronchiectasis, interlobular septal thickening, reticulation, honeycomb-like appearance, interstitial pneumonia pattern | 1  | 0  | 1  | 1  |
| Aissaoui et al. <sup>59</sup>  | Follow-up assessment      | 150   | CT        | GGO, reticulation, Fibrotic change, emphysematous changes                                                                    | 1  | 0  | 0  | 1  |
| Dayco et al. <sup>58</sup>     | prolonged hospitalization | 90    | CT        | Fibrotic change, pulmonary edema                                                                                             | 1  | 0  | 0  | 0  |
| Garg et al. <sup>28</sup>      | Follow-up assessment      | 53    | CT        | interlobular septal thickening, parenchymal band, Fibrotic change, bronchiectasis, bronchiolectasis, crazy-paving pattern    | 1  | 0  | 1  | 1  |
| Hamad et al. <sup>33</sup>     | re-admission              | 35    | CXR       | pneumothorax, airspace opacity                                                                                               | 0  | 1  | 0  | 1  |
| Heiss et al. <sup>29</sup>     | Follow-up assessment      | 97    | CT        | GGO, Consolidation                                                                                                           | 0  | 0  | 0  | 1  |
| Liu et al. <sup>59</sup>       | Re-admission              | 46    | CT        | GGO, Consolidation                                                                                                           | 0  | 0  | 0  | 1  |
| Malik et al. <sup>34</sup>     | prolonged hospitalization | 42    | CT        | GGO, Fibrotic change, bronchiectasis, architectural distortion, linear scarring, airspace disease, COVID pneumonia           | 1  | 0  | 1  | 1  |
| Mazzolini et al. <sup>60</sup> | prolonged hospitalization | 55    | CT        | GGO, Fibrotic change, architectural distortion, emphysematous changes, volume loss                                           | 1  | 0  | 0  | 0  |
| Mitrani et al. <sup>61</sup>   | Follow-up assessment      | 60    | CXR       | bilateral pneumonia/viral pneumonitis                                                                                        | 0  | 0  | 0  | 1  |
| Susanto et al. <sup>62</sup>   | Follow-up assessment      | 75    | CT        | Fibrotic change, Consolidation, bronchiolectasis, parenchymal band                                                           | 1  | 0  | 1  | 1  |
| Zhu et al. <sup>63</sup>       | prolonged hospitalization | 28    | CT        | Fibrotic change                                                                                                              | NM | NM | NM | NM |
| Boehm et al. <sup>64</sup>     | prolonged hospitalization | 40    | CT        | Consolidation                                                                                                                | NM | NM | NM | 1  |
| Total                          | ---                       | 60.18 | CT/CXR/US | ---                                                                                                                          | 13 | 7  | 20 | 27 |

Table S6. Frequency of lung imaging abnormalities per different evaluation setting

| <b>Evaluation setting</b>        | <b>First Author</b>        | <b>Number of Long COVID cases underwent imaging</b> | <b>Positive imaging</b> | <b>Negative imaging</b> | <b>Category Interstitial abnormalities</b> | <b>Category Pleural abnormalities</b> | <b>Category Airway abnormalities</b> | <b>Category Parenchymal abnormalities</b> |
|----------------------------------|----------------------------|-----------------------------------------------------|-------------------------|-------------------------|--------------------------------------------|---------------------------------------|--------------------------------------|-------------------------------------------|
| <b>Follow-up evaluation</b>      | <i>Armange et al.</i>      | 23                                                  | 4                       | 19                      | 0                                          | 0                                     | 0                                    | 4                                         |
|                                  | Bai et al.                 | 4                                                   | 4                       | 0                       | 3                                          | 0                                     | 0                                    | 1                                         |
|                                  | <i>Cesarone et al.</i>     | 18                                                  | 7                       | 11                      | 7                                          | 0                                     | 0                                    | 0                                         |
|                                  | <i>Rinaldo et al.</i>      | 68                                                  | 43                      | 25                      | NA                                         | NA                                    | NA                                   | NA                                        |
|                                  | <i>Sollini et al.</i>      | 10                                                  | 2                       | 8                       | 6                                          | 0                                     | 0                                    | 0                                         |
|                                  | <i>Sollini et al.</i>      | 13                                                  | 4                       | 9                       | NA                                         | NA                                    | NA                                   | NA                                        |
|                                  | Yin et al.                 | 91                                                  | NM                      | NM                      | 76                                         | 7                                     | 22                                   | 68                                        |
|                                  | Miwa et al.                | 12                                                  | 12                      | 0                       | 0                                          | 0                                     | 0                                    | 12                                        |
|                                  | Lago et al.                | 1                                                   | 1                       | 0                       | 0                                          | 0                                     | 0                                    | 1                                         |
|                                  | Lago et al.                | 1                                                   | 1                       | 0                       | 0                                          | 0                                     | 0                                    | 1                                         |
|                                  | Lago et al.                | 1                                                   | 1                       | 0                       | 0                                          | 0                                     | 0                                    | 1                                         |
|                                  | Lago et al.                | 1                                                   | 1                       | 0                       | 0                                          | 0                                     | 0                                    | 1                                         |
|                                  | <i>Aissaoui et al.</i>     | 1                                                   | 1                       | 0                       | 1                                          | 0                                     | 0                                    | 1                                         |
|                                  | Garg et al.                | 1                                                   | 1                       | 0                       | 1                                          | 0                                     | 1                                    | 1                                         |
|                                  | Heiss et al.               | 1                                                   | 1                       | 0                       | 0                                          | 0                                     | 0                                    | 1                                         |
|                                  | Mitrani et al.             | 1                                                   | 1                       | 0                       | 0                                          | 0                                     | 0                                    | 1                                         |
|                                  | <i>Susanto et al.</i>      | 1                                                   | 1                       | 0                       | 1                                          | 0                                     | 1                                    | 1                                         |
|                                  | <i>Total FU evaluation</i> | 248                                                 | 85                      | 72                      | 95                                         | 7                                     | 24                                   | 94                                        |
| <b>Re-admission</b>              | <i>Tung-Chen et al.</i>    | 1                                                   | 1                       | 0                       | 0                                          | 1                                     | 0                                    | 0                                         |
|                                  | <i>Tung-Chen et al.</i>    | 1                                                   | 1                       | 0                       | 0                                          | 0                                     | 0                                    | 1                                         |
|                                  | <i>Tung-Chen et al.</i>    | 1                                                   | 1                       | 0                       | 0                                          | 0                                     | 0                                    | 0                                         |
|                                  | Scelfo et al.              | 1                                                   | 1                       | 0                       | 1                                          | 0                                     | 0                                    | 1                                         |
|                                  | Scelfo et al.              | 1                                                   | 1                       | 0                       | 1                                          | 1                                     | 0                                    | 1                                         |
|                                  | Betelli et al.             | 1                                                   | 1                       | 0                       | 0                                          | 1                                     | 0                                    | 1                                         |
|                                  | Zhou et al.                | 1                                                   | 1                       | 0                       | 0                                          | 0                                     | 0                                    | 1                                         |
|                                  | Alhiyari et al.            | 1                                                   | 1                       | 0                       | 1                                          | 0                                     | 1                                    | 1                                         |
|                                  | Hamad et al.               | 1                                                   | 1                       | 0                       | 0                                          | 1                                     | 0                                    | 1                                         |
|                                  | Liu et al.                 | 1                                                   | 1                       | 0                       | 0                                          | 0                                     | 0                                    | 1                                         |
|                                  | <i>Total Re-admission</i>  | 10                                                  | 10                      | 0                       | 3                                          | 3                                     | 1                                    | 9                                         |
| <b>Prolonged hospitalization</b> | Gaspardone et al.          | 70                                                  | NM                      | NM                      | NA                                         | NA                                    | NA                                   | NA                                        |
|                                  | Aesif et al.               | 1                                                   | 1                       | 0                       | 0                                          | 1                                     | 0                                    | 1                                         |
|                                  | Aesif et al.               | 1                                                   | 1                       | 0                       | 0                                          | 1                                     | 0                                    | 1                                         |
|                                  | Aesif et al.               | 1                                                   | 1                       | 0                       | 0                                          | 0                                     | 0                                    | 1                                         |
|                                  | Rai et al.                 | 1                                                   | 1                       | 0                       | 1                                          | 0                                     | 1                                    | 1                                         |
|                                  | Rai et al.                 | 1                                                   | 1                       | 0                       | 1                                          | 0                                     | 0                                    | 1                                         |
|                                  | Rai et al.                 | 1                                                   | 1                       | 0                       | 1                                          | 0                                     | 0                                    | 1                                         |
|                                  | Singh et al.               | 1                                                   | 1                       | 0                       | 1                                          | 0                                     | 1                                    | 0                                         |

|  |                                 |    |    |    |    |    |    |    |
|--|---------------------------------|----|----|----|----|----|----|----|
|  | Abdelnour et al.                | 1  | 1  | 0  | 0  | 0  | 0  | 1  |
|  | Horii et al.                    | 1  | 1  | 0  | 0  | 1  | 0  | 1  |
|  | Dayco et al.                    | 1  | 1  | 0  | 1  | 0  | 0  | 0  |
|  | Malik et al.                    | 1  | 1  | 0  | 1  | 0  | 1  | 1  |
|  | Mazzolini et al.                | 1  | 1  | 0  | 1  | 0  | 0  | 0  |
|  | Zhu et al.                      | 1  | NM | NM | NM | NM | NM | NM |
|  | Boehm et al.                    | 1  | NM | NM | NM | NM | NM | 1  |
|  | Total prolonged hospitalization | 84 | 12 | 0  | 7  | 3  | 3  | 10 |
